# Supplementary material for: Treatment of metastatic ALK-positive non-small cell lung cancer: real-world outcomes in a single center study
Source: PubMed Central journal article supplement — Transl Lung Cancer Res. 2024 Nov 12;13(11):2918–33. doi: 10.21037/tlcr-24-396 (PMC11632442; doi:10.21037/tlcr-24-396), 2024-11-12
Supplement: tlcr-13-11-2918-dss.pdf [file tlcr-13-11-2918-dss.pdf]

## Data Sharing Statement

|                     |                                                                                                                                                     |                                                                                                                                                                                                         |
|---------------------|-----------------------------------------------------------------------------------------------------------------------------------------------------|---------------------------------------------------------------------------------------------------------------------------------------------------------------------------------------------------------|
| <b>Article Info</b> | <a href="https://dx.doi.org/10.21037/tlcr-24-396">https://dx.doi.org/10.21037/tlcr-24-396</a>                                                       |                                                                                                                                                                                                         |
| <b>Item</b>         | <b>Question</b>                                                                                                                                     | <b>Authors' Response<br/>(place "-" if not applicable)</b>                                                                                                                                              |
| 1                   | Would you like to share data collected for your study to others?                                                                                    | Yes.                                                                                                                                                                                                    |
| 2                   | If not, would you like to share the reason for your decision?                                                                                       | -                                                                                                                                                                                                       |
| 3                   | What data in particular will be shared?                                                                                                             | Clinical outcomes from treatment with ALK-TKI in advanced ALK+ NSCLC. Data such as overall survival and progression-free survival will be shared. Molecular data such as resistance mechanisms as well. |
| 4                   | Any other documents will be shared? Such as study protocol, statistical analysis plan, informed consent form, clinical study report, analytic code. | -                                                                                                                                                                                                       |
| 5                   | When will data availability begin?                                                                                                                  | From the publication date.                                                                                                                                                                              |
| 6                   | When will data availability end?                                                                                                                    | Two years within the publication date since survival data may be updated over time.                                                                                                                     |
| 7                   | To whom will you share the data?                                                                                                                    | Medical oncologist                                                                                                                                                                                      |
| 8                   | For what type of analysis or purpose?                                                                                                               | To evaluate real-world data in advanced ALK-positive NSCLC patients treated with ALK-TKI, focusing on clinical aspects, treatments, resistance, and outcomes.                                           |
| 9                   | How or where can the data/documents be obtained?                                                                                                    | Emails could be sent to corresponding author to obtain shared data: <a href="mailto:simon.ekman@ki.se">simon.ekman@ki.se</a>                                                                            |
| 10                  | Any other restrictions?                                                                                                                             | We may balance the potential benefit and risks for each request and then provide the data that could be shared.                                                                                         |
