# Supplementary material for: Treatment of metastatic ALK-positive non-small cell lung cancer: real-world outcomes in a single center study
Source: PubMed Central journal article supplement — Transl Lung Cancer Res. 2024 Nov 12;13(11):2918–33. doi: 10.21037/tlcr-24-396 (PMC11632442; doi:10.21037/tlcr-24-396), 2024-11-12
Supplement: tlcr-13-11-2918-supplementary.pdf [file tlcr-13-11-2918-supplementary.pdf]

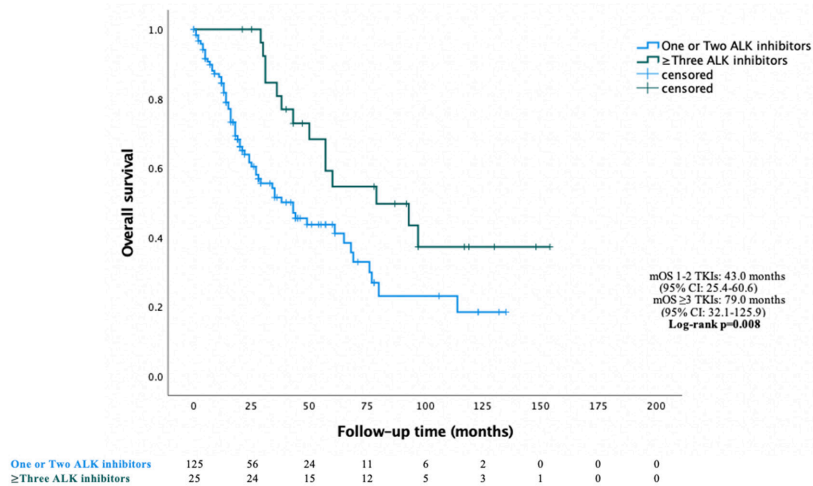

**Figure S1** Kaplan-Meier curve with longer OS for ALK-positive NSCLC patients receiving at least three ALK inhibitors compared to one or two. ALK, anaplastic lymphoma kinase; mOS, median overall survival; TKI, tyrosine kinase inhibitor; OS, overall survival; NSCLC, non-small cell lung cancer.

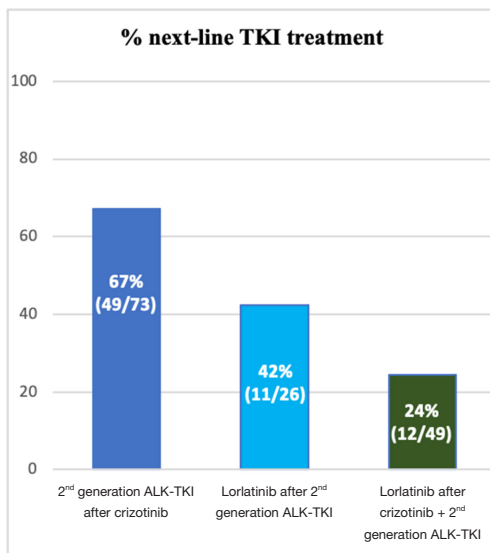

**Figure S2** Histogram showing subsequent therapy after progression on initial ALK-TKI. ALK, anaplastic lymphoma kinase; TKI, tyrosine kinase inhibitor.

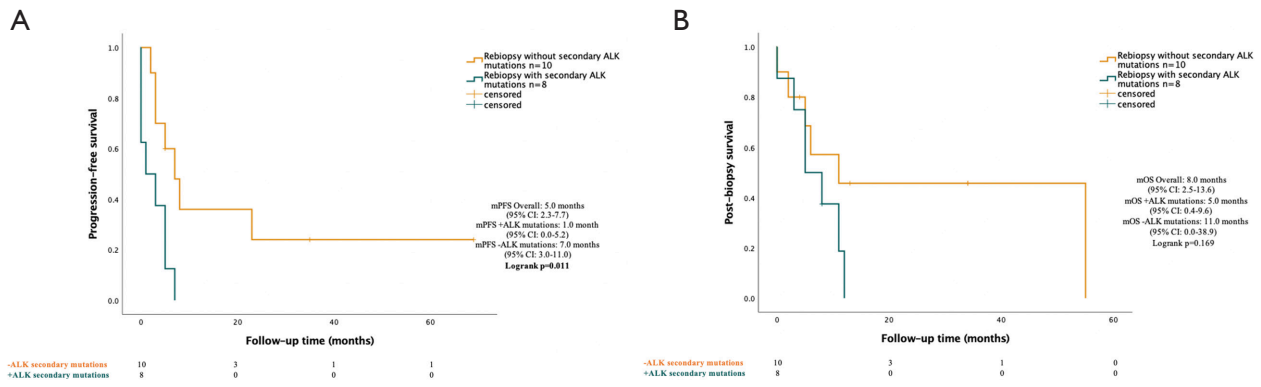

**Figure S3** Impact of secondary *ALK* mutations on outcome. Kaplan-Meier curves showing PFS on next-line treatment (A) and post-biopsy survival (B) for patients with and without secondary *ALK* mutations. *ALK*, anaplastic lymphoma kinase; mPFS, median progression-free survival; CI, confidence interval; mOS, median overall survival; PFS, progression-free survival.

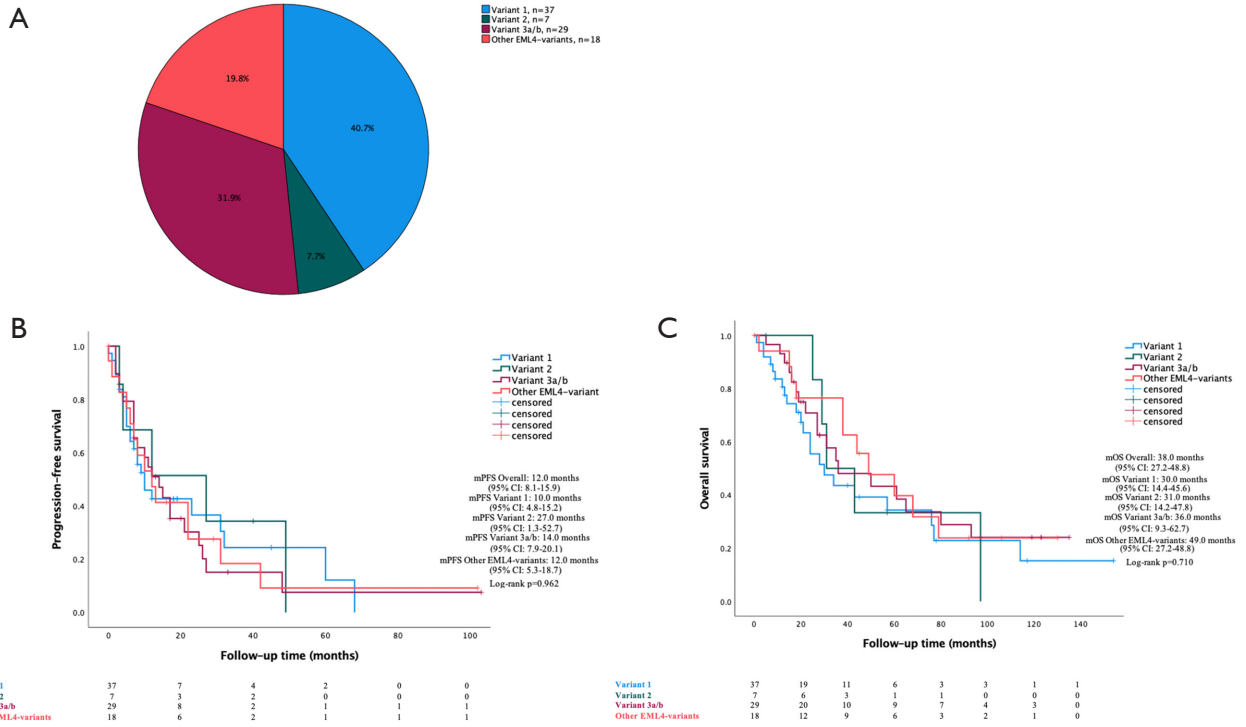

**Figure S4** Impact of *EML4*-fusion variants on outcome. Pie chart showing the distribution of the different *EML4*-fusion variants (A). Kaplan-Meier curves for PFS (B) and OS (C) showed no statistically significant difference between the different *EML4*-fusion variants. *EML4*, echinoderm microtubule-associated protein-like 4; mPFS, median progression-free survival; CI, confidence interval; mOS, median overall survival.

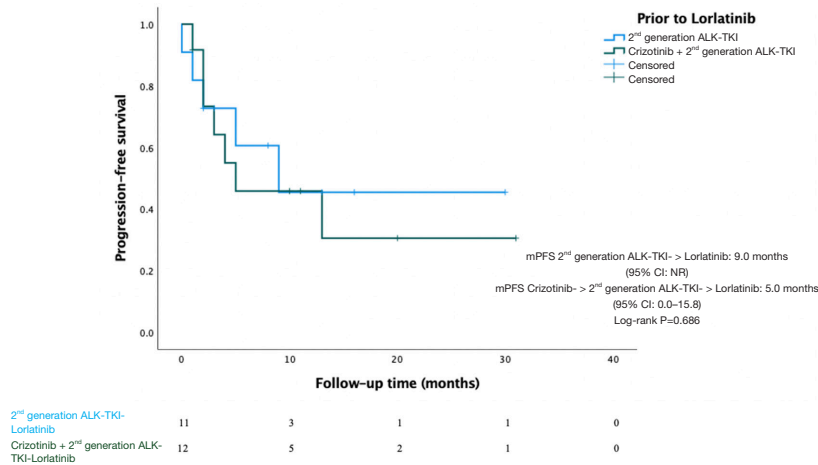

**Figure S5** Kaplan-Meier curve demonstrating PFS regarding treatment prior to lorlatinib. ALK, anaplastic lymphoma kinase; TKI, tyrosine kinase inhibitor; mPFS, median progression-free survival; NR, not reached.

**Table S1** Medians for survival time according to treatment status (log-rank test)

| Treatment status                                                                                       | Patients, n (%)         | mOS (95% CI) (months)                  | Log-rank P value |
|--------------------------------------------------------------------------------------------------------|-------------------------|----------------------------------------|------------------|
| 2 <sup>nd</sup> generation ALK-TKI after crizotinib (yes vs. no)                                       | 49 (66.2) vs. 25 (33.8) | 50.0 (32.1–67.9) vs. 14.0 (7.8–20.2)   | <0.001*          |
| First-line ALK-TKI vs. chemotherapy                                                                    | 98 (60.4) vs. 54 (29.6) | 65.0 (22.7–107.3) vs. 44.0 (22.8–65.2) | 0.76             |
| Subsequent line of any systemic therapy upon progression on initial ALK-TKI (yes vs. no)               | 70 (71.4) vs. 28 (28.6) | 44.0 (24.8–63.2) vs. 13.0 (9.1–16.9)   | <0.001*          |
| Subsequent line of 2 <sup>nd</sup> generation ALK-TKI upon progression on initial ALK-TKI (yes vs. no) | 59 (60.2) vs. 39 (39.8) | 57.0 (38.0–76.0) vs. 16.0 (11.6–20.4)  | <0.001*          |

\*, clinical variables that are statistically significant between the groups. mOS, median overall survival; CI, confidence interval; ALK, anaplastic lymphoma kinase; TKI, tyrosine kinase inhibitor.

**Table S2** Results of survival analysis for the numbers of treatment with ALK-TKIs with Cox regression analysis and log-rank test

| ALK-TKIs                 | Patients, n (%) | mOS (95% CI) (months) | HR (95% CI)      | P value         |
|--------------------------|-----------------|-----------------------|------------------|-----------------|
| ≥ Three ALK inhibitors   | 25 (16.7)       | 79.0 (32.1–125.9)     | 0.46 (0.25–0.83) | 0.008*          |
| One + two ALK inhibitors | 125 (83.3)      | 43.0 (25.4–60.6)      | Reference        | 0.11 (log-rank) |
| One                      | 85 (56.7)       | 38.0 (6.7–69.3)       |                  |                 |
| Two                      | 40 (26.7)       | 43.0 (25.8–60.2)      |                  |                 |
| Three                    | 17 (11.3)       | NR                    |                  |                 |
| Four                     | 5 (3.3)         | 79.0 (30.0–128.0)     |                  |                 |
| Five                     | 2 (1.3)         | 38.0 (NR)             |                  |                 |
| Six                      | 1 (0.7)         | 60.0 (NR)             |                  |                 |
| Overall                  | 150 (100.0)     | 49.0 (30.5–67.5)      |                  |                 |

\*, clinical variables that are statistically significant between the groups. ALK, anaplastic lymphoma kinase; TKI, tyrosine kinase inhibitor; mOS, median overall survival; HR, hazard ratio; CI, confidence interval; NR, not reached.

**Table S3** Treatment patterns with ALK-TKI sequences and proportions of patients

| Treatment pattern    | Overall (n=150), n (%) | Crizotinib (n=74)                                                | 2 <sup>nd</sup> generation ALK-TKI (n=76) |
|----------------------|------------------------|------------------------------------------------------------------|-------------------------------------------|
| One ALK inhibitor    | 85 (56.7)              |                                                                  |                                           |
|                      | 25 (16.7)              | Crizotinib                                                       |                                           |
|                      | 3 (2.0)                |                                                                  | Ceritinib                                 |
|                      | 56 (37.3)              |                                                                  | Alectinib                                 |
|                      | 1 (0.7)                |                                                                  | Brigatinib                                |
| Two ALK inhibitors   | 40 (26.7)              |                                                                  |                                           |
|                      | 14 (9.3)               | Crizotinib-ceritinib                                             |                                           |
|                      | 14 (9.3)               | Crizotinib-alectinib                                             |                                           |
|                      | 1 (0.7)                | Crizotinib-brigatinib                                            |                                           |
|                      | 3 (2.0)                |                                                                  | Alectinib-brigatinib                      |
|                      | 6 (4.0)                |                                                                  | Alectinib-lorlatinib                      |
|                      | 1 (0.7)                |                                                                  | Ceritinib-brigatinib                      |
|                      | 1 (0.7)                |                                                                  | Ceritinib-alectinib                       |
| Three ALK inhibitors | 17 (11.3)              |                                                                  |                                           |
|                      | 2 (1.3)                | Crizotinib-alectinib-brigatinib                                  |                                           |
|                      | 3 (2.0)                | Crizotinib-alectinib-lorlatinib                                  |                                           |
|                      | 4 (2.7)                | Crizotinib-brigatinib-lorlatinib                                 |                                           |
|                      | 2 (1.3)                | Crizotinib-ceritinib-alectinib                                   |                                           |
|                      | 2 (1.3)                | Crizotinib-alectinib-ceritinib                                   |                                           |
|                      | 1 (0.7)                | Crizotinib-brigatinib-ceritinib                                  |                                           |
|                      | 3 (2.0)                |                                                                  | Alectinib-brigatinib-lorlatinib           |
|                      | Four ALK inhibitors    | 5 (3.3)                                                          |                                           |
| 1 (0.7)              |                        | Crizotinib-alectinib-lorlatinib-brigatinib                       |                                           |
| 1 (0.7)              |                        | Crizotinib-ceritinib-alectinib-brigatinib                        |                                           |
| 1 (0.7)              |                        | Crizotinib-ceritinib-alectinib-lorlatinib                        |                                           |
| 2 (1.3)              |                        |                                                                  | Ceritinib-alectinib-brigatinib-lorlatinib |
| Five ALK inhibitors  | 2 (1.3)                |                                                                  |                                           |
|                      | 2 (1.3)                | Crizotinib-ceritinib-alectinib-lorlatinib-brigatinib             |                                           |
| Six ALK inhibitors   | 1 (0.7)                |                                                                  |                                           |
|                      | 1 (0.7)                | Crizotinib-brigatinib-lorlatinib-alectinib-brigatinib-crizotinib |                                           |

ALK, anaplastic lymphoma kinase; TKI, tyrosine kinase inhibitor.
